# Supplementary material for: Identification of ubiquitin Ser57 kinases regulating the oxidative stress response in yeast
Source: eLife. 2020 Oct 19;9:e58155. doi: 10.7554/eLife.58155 (PMC7647399; doi:10.7554/eLife.58155)
Supplement: Figure 1—source data 1. [file elife-58155-fig1-data1.xlsx]

## Sheet: Fig 1D
	Viability Assay (Propidium Iodide Staining)
	65ᵒC, 5 min
	SUB280 strain
	Replicates	Ub wt				Ub S57D
		PI stained	PI negative	Total	% PI stained cells	PI stained	PI negative	Total	% PI stained cells
	R1	26	2	28	0.928571	11	31	42	0.261905
	R2	31	0	31	1	23	35	58	0.396552
	R3	31	2	33	0.939394	23	24	47	0.489362
				AVE	0.955988			AVE	0.382606
				STDEV	0.0384973			STDEV	0.114368
					Ub wt				Ub S57D
									Student T-test
									0.00104542

## Sheet: Fig 1E
	Growth Curve at 39ᵒC (-URA Synthetic Medium)
	SUB280 strain
	Ubiquitin in trans	Ub						Ub S57A
	Time (h)	Replicates				AVE	STDEV	Replicates				AVE	STDEV
		R1	R2	R3	R4			R1	R2	R3	R4
	0	0.1	0.1	0.1	0.1	0.1	0	0.1	0.1	0.1	0.1	0.1	0
	6	0.483	0.535	0.546	0.442	0.5015	0.0482528	0.304	0.276	0.304	0.278	0.2905	0.0156098
	12	0.819	0.903	0.891	0.719	0.833	0.0845695	0.519	0.462	0.448	0.47	0.47475	0.0308693
	24	1.188	1.282	1.218	1.004	1.173	0.119292	0.689	0.596	0.688	0.597	0.6425	0.0531194
	30	1.37	1.24	1.29	1.03	1.2325	0.14523	0.73	0.8	0.54	0.45	0.63	0.162686
												Student T-test
												Time	T-test value
												6	0.00141675
												12	0.00271449
												24	0.00138415
												30	0.0013048

## Sheet: Fig 1, Suppl 1
	Growth at 38ᵒC (-URA Synthetic Medium)
	SUB280 strain
	Ubiquitin in trans	Ub					Ub S57A
	Time (h)	Replicates			AVE	STDEV	Replicates			AVE	STDEV
		R1	R2	R3			R1	R2	R3
	0	0.1	0.1	0.1	0.1	1.69967e-17	0.1	0.1	0.1	0.1	1.69967e-17
	24	4.57	4.3	4.48	4.45	0.137477	3.09	3.1	3.22	3.13667	0.0723418
					Ub					Ub S57A
										Student T-test
										0.00208689
