# Supplementary material for: Identification of ubiquitin Ser57 kinases regulating the oxidative stress response in yeast
Source: eLife. 2020 Oct 19;9:e58155. doi: 10.7554/eLife.58155 (PMC7647399; doi:10.7554/eLife.58155)
Supplement: Figure 2—source data 1. — The source data for both replicates in Figure 2F are also included. [file elife-58155-fig2-data1.xlsx]

## Sheet: Fig 2 A
SUB280
pADH1-Ub in trans	WT						S57A						S57D						Student T-test (compared to wt)
H2O2 (mM)	Replicates				AVE	STDEV	Replicates				AVE	STDEV	Replicates				AVE	STDEV	S57A	S57D
	R1	R2	R3	R4			R1	R2	R3	R4			R1	R2	R3	R4
0	13	12.97	12.7	13.17	12.96	0.194422	13.26	13.32	12.94	12.89	13.1025	0.218842	13.04	12.95	12.89	13.08	12.99	0.0860233	0.196009	0.324626
0.25	11.83	12.33	11.79	12.58	12.1325	0.386469	13.24	13.08	12.91	12.87	13.025	0.169804	12.63	12.63	12.54	12.76	12.64	0.0905539	0.0172854	0.0239512
0.5	9.75	8.54	9.46	9.57	9.33	0.540062	13.04	13.07	12.76	12.81	12.92	0.157692	10.01	10.97	10.32	10.44	10.435	0.400042	0.000715344	0.0487717
0.75	4.99	4.66	5.04	4.93	4.905	0.169411	12.97	12.89	12.48	12.77	12.7775	0.21469	5.38	6.37	6.21	5.89	5.9625	0.436606	1.01721e-05	0.0152073
1	2.53	2.62	2.95	3.59	2.9225	0.480234	11.44	11.98	11.32	11.48	11.555	0.291376	3.12	3.47	3.35	3.27	3.3025	0.146828	5.57323e-05	0.113559
1.25	1.65	1.39	1.47	1.84	1.5875	0.200395	8.7	8.88	7.64	9.87	8.7725	0.913578	1.75	1.27	1.65	1.64	1.5775	0.21093	0.00017882	0.459105
1.5	1.09	1	1.27	1.17	1.1325	0.115	6.63	6.9	5.23	6.54	6.325	0.745855	1.28	1.57	1.3	1.12	1.3175	0.186615	0.0005921	0.135832
1.75	0.71	0.64	0.73	0.87	0.7375	0.0963933	3.41	3.9	3.64	2.75	3.425	0.492511	0.72	1.2	1.01	0.83	0.94	0.210555	0.00136862	0.119737
2	0.34	0.31	0.36	0.42	0.3575	0.0464579	1.88	2.36	2.2	1.68	2.03	0.307029	0.36	0.42	0.31	0.29	0.345	0.058023	0.00117072	0.411182
2.25	0.15	0.11	0.13	0.16	0.1375	0.0221736	1.07	1.32	1.16	1.02	1.1425	0.131751	0.21	0.18	0.23	0.14	0.19	0.0391578	0.000483136	0.0664209
2.5	0.06	0.08	0.08	0.09	0.0775	0.0125831	0.56	0.63	0.42	0.38	0.4975	0.117296	0.1	0.11	0.08	0.07	0.09	0.0182574	0.0033351	0.215445
2.75	0.02	0.01	0.04	0.02	0.0225	0.0125831	0.15	0.18	0.12	0.23	0.17	0.0469042	0.03	0.06	0.02	0.04	0.0375	0.0170783	0.0065363	0.187548

## Sheet: Fig 2 B
	CFU Count (YPD Plate)
	*Cells were treated with H2O2 for 20 min prior to spread-plating onto YPD plate
		Actual Cell Count								H2O2-treated compared with untreated					Student T-test
		untreated			1.5 mM H2O2 (20 min)*
	pADH1-Ub	R1	R2	AVE	R1	R2	R3	AVE	STDEV	R1	R2	R3	AVE	STDEV	pre-treatment vs post-treatment comparison
	WT	211	258	234.5	261	251	254	255.333	5.1316	1.11301	1.07036	1.08316	1.08884	0.0218832	0.03194
	S57A	342	330	336	227	268	245	246.667	20.5508	0.675595	0.797619	0.729167	0.734127	0.0611629	0.00569453
	S57D	234	206	220	258	191	242	230.333	34.9905	1.17273	0.868182	1.1	1.04697	0.159048	0.0203212
		untreated	1.5 mM H2O2 (20 min)
	WT	100	108.884	2.18832
	S57A	100	73.4127	6.11629
	S57D	100	104.697	15.9048

## Sheet: Fig 2 D,E
																		Student T-test
Immunoblot Fluorescence Intensity			untreated							1 mM H2O2 (15 min)								paired with untreated Ub wt				paired with H2O2-treated Ub wt
S. cerevisiae SUB280 (Δubi)			Biological Replicates				AVERAGE	STDEV		Biological Replicates				AVERAGE	STDEV			untreated		1 mM H2O2 (15 min)		1 mM H2O2 (15 min)
		pADH1-Ub in trans	R1	R2	R3	R4				R1	R2	R3	R4					K48	K63	K48	K63	K48	K63
loading control (Ub)	Raw Data	WT	53500	41800	39400	47600	45575	6305.75		90000	80000	87300	93600	87725	5760.43		Ub wt			0.00120023	0.0560444
		S57D	36600	37100	34500	32300	35125	2194.5		89800	90400	91900	116000	97025	12680.8		Ub S57D	0.00915763	0.412877	8.13017e-05	4.48092e-05	0.0484651	0.00488467
		S57A	48600	30400	30600	42900	38125	9107.28		109000	101000	121000	100000	107750	9708.24		Ub S57A	0.495342	0.0142584	0.052161	0.0131547	0.00245498	0.224549
K48	Raw Data	WT	25900	21100	24900	18400	22575	3467.35		95160	61070	90720	85680	83157.5	15225.8
		S57D	30400	30400	28800	30800	30100	886.942		129250	131640	128070	143780	133185	7217.77			untreated vs H2O2-treated
		S57A	16700	19300	17600	19600	18300	1383.23		87460	74410	78860	70260	77747.5	7365.95			K48	K63
	Normalized Data	WT	0.484112	0.504785	0.63198	0.386555	0.501858	0.100913		1.05733	0.763375	1.03918	0.915385	0.943817	0.135827		Ub wt	0.00120023	0.0560444
		S57D	0.830601	0.819407	0.834783	0.95356	0.859588	0.0629838		1.43931	1.45619	1.39358	1.23948	1.38214	0.0987158		Ub S57D	0.00112987	0.00284462
		S57A	0.343621	0.634868	0.575163	0.456876	0.502632	0.129261		0.802385	0.736733	0.651736	0.7026	0.723363	0.0632057		Ub S57A	0.082328	0.346661
	Relative Intensity	WT	0.96464	1.00583	1.25928	0.770247	1	0.201078		3.32116	2.39782	3.26413	2.87529	1.88065	0.426643
		S57D	1.65505	1.63275	1.66338	1.90006	1.71281	0.125501		3.7167	3.7603	3.59861	3.20069	2.75405	0.254912
		S57A	0.684699	1.26504	1.14607	0.91037	1.00154	0.257565		1.45631	1.33715	1.18288	1.2752	1.44137	0.114716
K63	Raw Data	WT	11000	11800	11700	11900	11600	408.248		20370	20240	13160	17280	17762.5	3383.93
		S57D	10900	9780	8540	8240	9365	1221.3		2840	7630	10490	5580	6635	3233.48
		S57A	13200	15700	13700	15600	14550	1287.12		18500	21060	22050	25300	21727.5	2812.42
	Normalized Data	WT	0.205607	0.282297	0.296954	0.25	0.258715	0.0404751		0.226333	0.253	0.150745	0.184615	0.203673	0.0451341
		S57D	0.297814	0.263612	0.247536	0.255108	0.266018	0.0221915		0.0316258	0.0844027	0.114146	0.0481034	0.0695694	0.0370026
		S57A	0.271605	0.516447	0.447712	0.363636	0.39985	0.105899		0.169725	0.208515	0.182231	0.253	0.203368	0.0368259
	Relative Intensity	WT	0.794727	1.09115	1.14781	0.966316	1	0.156447		1.61039	1.80012	1.07256	1.31356	1.44916	0.321134
		S57D	1.15113	1.01893	0.956793	0.986061	1.02823	0.0857759		0.121391	0.323967	0.438131	0.184638	0.267032	0.142029
		S57A	1.04982	1.9962	1.73053	1.40555	1.54553	0.409329		1.37341	1.6873	1.47461	2.04727	1.64565	0.297994

## Sheet: Fig 2F Rep1
Sequence	Length	Modifications	Modified sequence	Ratio H/L	Ratio H/L normalized	log(norm)
TLTGKTITLEVESSDTIDNVK	21	GlyGly (K)	_TLTGK(gl)TITLEVESSDTIDNVK_	0.45502	0.4226	-1.24264
TLSDYNIQK	9	Phospho (ST)	_TLS(ph)DYNIQK_	0.70043	0.58105	-0.783266
LIFAGKQLEDGR	12	GlyGly (K)	_LIFAGK(gl)QLEDGR_	0.70065	0.61283	-0.706441
TLSDYNIQKESTLHLVLR	18	Phospho (ST)	_TLSDYNIQKES(ph)TLHLVLR_	0.72518	0.74625	-0.422269
IQDKEGIPPDQQR	13	Unmodified	_IQDKEGIPPDQQR_	1.0466	0.8665	-0.206728
LIFAGKQLEDGR	12	Unmodified	_LIFAGKQLEDGR_	0.94973	0.89302	-0.163236
IQDKEGIPPDQQR	13	Unmodified	_IQDKEGIPPDQQR_	1.0922	0.91334	-0.130776
EGIPPDQQR	9	Unmodified	_EGIPPDQQR_	1.1353	0.93967	-0.0897739
TLSDYNIQKESTLHLVLR	18	Unmodified	_TLSDYNIQKESTLHLVLR_	1.1658	0.96228	-0.0554714
IQDKEGIPPDQQR	13	Unmodified	_IQDKEGIPPDQQR_	0.97146	0.96517	-0.051145
TLSDYNIQK	9	Unmodified	_TLSDYNIQK_	1.1483	0.97248	-0.0402595
EGIPPDQQR	9	Unmodified	_EGIPPDQQR_	1.1887	0.97809	-0.0319609
TLSDYNIQK	9	Unmodified	_TLSDYNIQK_	1.2442	1.0093	0.0133551
TLSDYNIQKESTLHLVLR	18	Unmodified	_TLSDYNIQKESTLHLVLR_	1.2139	1.0106	0.0152121
TLTGKTITLEVESSDTIDNVK	21	Unmodified	_TLTGKTITLEVESSDTIDNVK_	1.0027	1.0455	0.0641931
TLTGKTITLEVESSDTIDNVK	21	Unmodified	_TLTGKTITLEVESSDTIDNVK_	1.0182	1.0596	0.0835197
TITLEVESSDTIDNVK	16	Unmodified	_TITLEVESSDTIDNVK_	1.3113	1.0614	0.0859685
LIFAGKQLEDGR	12	GlyGly (K)	_LIFAGK(gl)QLEDGR_	1.3791	1.1313	0.177982
IQDKEGIPPDQQR	13	Unmodified	_IQDKEGIPPDQQR_	1.2087	1.1767	0.234747
IQDKEGIPPDQQR	13	Unmodified	_IQDKEGIPPDQQR_	1.1126	1.1875	0.247928
TLSDYNIQKESTLHLVLR	18	GlyGly (K)	_TLSDYNIQK(gl)ESTLHLVLR_	2.3379	2.0063	1.00454

## Sheet: Fig 2F Rep2
Sequence	Length	Modifications	Modified sequence	Ratio H/L	Ratio H/L normalized	norm
TLSDYNIQK	9	Phospho (ST)	_TLpSDYNIQK_	1.3057	1.64892	0.721525
LIFAGKQLEDGR	12	GlyGly (K)	_LIFAGK(gl)QLEDGR_	1.2504	1.53667	0.619809
TITLEVESSDTIDNVK	16	Unmodified	_TITLEVESSDTIDNVK_	0.79717	1.32405	0.40496
ESTLHLVLR	9	Unmodified	_ESTLHLVLR_	0.80219	1.30725	0.386539
EGIPPDQQR	9	Unmodified	_EGIPPDQQR_	0.74199	1.24948	0.321324
IQDKEGIPPDQQR	13	Unmodified	_IQDKEGIPPDQQR_	0.73236	1.2093	0.274176
EGIPPDQQR	9	Unmodified	_EGIPPDQQR_	0.73319	1.16549	0.220931
TITLEVESSDTIDNVK	16	Unmodified	_TITLEVESSDTIDNVK_	0.83147	1.15772	0.211287
EGIPPDQQR	9	Unmodified	_EGIPPDQQR_	0.7328	1.14067	0.189883
IQDKEGIPPDQQR	13	Unmodified	_IQDKEGIPPDQQR_	0.69978	1.10997	0.150516
TITLEVESSDTIDNVK	16	Unmodified	_TITLEVESSDTIDNVK_	0.76551	1.09333	0.128725
IQDKEGIPPDQQR	13	Unmodified	_IQDKEGIPPDQQR_	0.69368	1.06238	0.0873063
TITLEVESSDTIDNVK	16	Unmodified	_TITLEVESSDTIDNVK_	0.75079	1.05199	0.0731229
TLSDYNIQKESTLHLVLR	18	Unmodified	_TLSDYNIQKESTLHLVLR_	0.78268	1.04738	0.0667884
IQDKEGIPPDQQR	13	Unmodified	_IQDKEGIPPDQQR_	0.74535	1.04489	0.0633462
TITLEVESSDTIDNVK	16	Unmodified	_TITLEVESSDTIDNVK_	0.81643	1.0363	0.0514452
IQDKEGIPPDQQR	13	Unmodified	_IQDKEGIPPDQQR_	0.68553	1.02546	0.0362715
TITLEVESSDTIDNVK	16	Unmodified	_TITLEVESSDTIDNVK_	0.90195	0.994228	-0.00835198
TITLEVESSDTIDNVK	16	Unmodified	_TITLEVESSDTIDNVK_	0.76415	0.974696	-0.0369763
IQDKEGIPPDQQR	13	Unmodified	_IQDKEGIPPDQQR_	0.76014	0.956365	-0.0643661
TITLEVESSDTIDNVK	16	Unmodified	_TITLEVESSDTIDNVK_	0.82351	0.953711	-0.0683759
IQDKEGIPPDQQR	13	Unmodified	_IQDKEGIPPDQQR_	0.72472	0.948151	-0.076811
TITLEVESSDTIDNVK	16	Unmodified	_TITLEVESSDTIDNVK_	0.81816	0.935935	-0.095519
TITLEVESSDTIDNVK	16	Unmodified	_TITLEVESSDTIDNVK_	0.80658	0.900094	-0.151853
TITLEVESSDTIDNVK	16	Unmodified	_TITLEVESSDTIDNVK_	0.70884	0.88768	-0.171888
TLSDYNIQKESTLHLVLR	18	Unmodified	_TLSDYNIQKESTLHLVLR_	0.67227	0.882543	-0.180262
TITLEVESSDTIDNVK	16	Unmodified	_TITLEVESSDTIDNVK_	0.7946	0.879413	-0.185387
TITLEVESSDTIDNVK	16	Unmodified	_TITLEVESSDTIDNVK_	0.77551	0.875346	-0.192076
EGIPPDQQR	9	Unmodified	_EGIPPDQQR_	0.73037	0.874976	-0.192685
TITLEVESSDTIDNVK	16	Unmodified	_TITLEVESSDTIDNVK_	0.71468	0.860396	-0.216927
TITLEVESSDTIDNVK	16	Unmodified	_TITLEVESSDTIDNVK_	0.68612	0.859432	-0.218545
TITLEVESSDTIDNVK	16	Unmodified	_TITLEVESSDTIDNVK_	0.6815	0.845645	-0.241876
TITLEVESSDTIDNVK	16	Unmodified	_TITLEVESSDTIDNVK_	0.67227	0.834314	-0.261338
TITLEVESSDTIDNVK	16	Unmodified	_TITLEVESSDTIDNVK_	0.67873	0.801602	-0.319042
TITLEVESSDTIDNVK	16	Unmodified	_TITLEVESSDTIDNVK_	0.6484	0.78689	-0.345765
TITLEVESSDTIDNVK	16	Unmodified	_TITLEVESSDTIDNVK_	0.68538	0.784223	-0.350664
TITLEVESSDTIDNVK	16	Unmodified	_TITLEVESSDTIDNVK_	0.64721	0.74743	-0.419989
TITLEVESSDTIDNVK	16	Unmodified	_TITLEVESSDTIDNVK_	0.59693	0.698145	-0.518402
TITLEVESSDTIDNVK	16	Unmodified	_TITLEVESSDTIDNVK_	0.38629	0.507527	-0.978444
