# Supplementary material for: Identification of ubiquitin Ser57 kinases regulating the oxidative stress response in yeast
Source: eLife. 2020 Oct 19;9:e58155. doi: 10.7554/eLife.58155 (PMC7647399; doi:10.7554/eLife.58155)
Supplement: Figure 3—source data 1. [file elife-58155-fig3-data1.xlsx]

## Sheet: Fig 3E Rep1
Sequence	Length	Modifications	Modified sequence	Ratio H/L	Ratio H/L normalized	log(norm)
TLSDYNIQK	9	Phospho (ST)	_TLS(ph)DYNIQK_	0.16345	0.25417	-1.97613
TLSDYNIQK	9	Phospho (ST)	_TLS(ph)DYNIQK_	0.28365	0.46126	-1.11635
TITLEVESSDTIDNVK	16	Unmodified	_TITLEVESSDTIDNVK_	0.33535	0.50473	-0.986416
IQDKEGIPPDQQR	13	Unmodified	_IQDKEGIPPDQQR_	0.39854	0.62046	-0.68859
TLSDYNIQKESTLHLVLR	18	Unmodified	_TLSDYNIQKESTLHLVLR_	0.47905	0.74438	-0.425889
TITLEVESSDTIDNVK	16	Unmodified	_TITLEVESSDTIDNVK_	0.49444	0.77244	-0.372505
TITLEVESSDTIDNVK	16	Unmodified	_TITLEVESSDTIDNVK_	0.51594	0.76995	-0.377163
TLSDYNIQKESTLHLVLR	18	Unmodified	_TLSDYNIQKESTLHLVLR_	0.51595	0.80469	-0.313495
IQDKEGIPPDQQR	13	Unmodified	_IQDKEGIPPDQQR_	0.51747	0.80483	-0.313244
EGIPPDQQR	9	Unmodified	_EGIPPDQQR_	0.52266	0.78089	-0.356809
IQDKEGIPPDQQR	13	Unmodified	_IQDKEGIPPDQQR_	0.52471	0.82085	-0.284809
IQDKEGIPPDQQR	13	Unmodified	_IQDKEGIPPDQQR_	0.53588	0.83122	-0.266698
ESTLHLVLR	9	Unmodified	_ESTLHLVLR_	0.53929	0.81828	-0.289334
IQDKEGIPPDQQR	13	Unmodified	_IQDKEGIPPDQQR_	0.54595	0.85159	-0.231769
IQDKEGIPPDQQR	13	Unmodified	_IQDKEGIPPDQQR_	0.54652	0.87475	-0.193057
TITLEVESSDTIDNVK	16	Unmodified	_TITLEVESSDTIDNVK_	0.55288	0.82936	-0.26993
EGIPPDQQR	9	Unmodified	_EGIPPDQQR_	0.55351	0.86505	-0.209145
IQDKEGIPPDQQR	13	Unmodified	_IQDKEGIPPDQQR_	0.5549	0.8616	-0.21491
TLSDYNIQK	9	Unmodified	_TLSDYNIQK_	0.55845	0.87067	-0.199802
ESTLHLVLR	9	Unmodified	_ESTLHLVLR_	0.56711	0.85471	-0.226493
EGIPPDQQR	9	Unmodified	_EGIPPDQQR_	0.57048	0.88997	-0.168171
EGIPPDQQR	9	Unmodified	_EGIPPDQQR_	0.57052	0.89509	-0.159895
TITLEVESSDTIDNVK	16	Unmodified	_TITLEVESSDTIDNVK_	0.57552	0.85932	-0.218733
TITLEVESSDTIDNVK	16	Unmodified	_TITLEVESSDTIDNVK_	0.57753	0.92817	-0.107539
TITLEVESSDTIDNVK	16	Unmodified	_TITLEVESSDTIDNVK_	0.57816	0.8647	-0.209728
TLTGKTITLEVESSDTIDNVK	21	Unmodified	_TLTGKTITLEVESSDTIDNVK_	0.57999	0.93849	-0.0915867
ESTLHLVLR	9	Unmodified	_ESTLHLVLR_	0.58446	0.87676	-0.189746
TITLEVESSDTIDNVK	16	Unmodified	_TITLEVESSDTIDNVK_	0.58959	0.94554	-0.0807896
TITLEVESSDTIDNVK	16	Unmodified	_TITLEVESSDTIDNVK_	0.59227	0.94547	-0.0808964
TITLEVESSDTIDNVK	16	Unmodified	_TITLEVESSDTIDNVK_	0.59661	0.96204	-0.0558312
TITLEVESSDTIDNVK	16	Unmodified	_TITLEVESSDTIDNVK_	0.59837	0.96436	-0.0523563
TLTGKTITLEVESSDTIDNVK	21	GlyGly (K)	_TLTGK(gl)TITLEVESSDTIDNVK_	0.59864	0.95913	-0.0602017
TITLEVESSDTIDNVK	16	Unmodified	_TITLEVESSDTIDNVK_	0.60332	0.93771	-0.0927863
TITLEVESSDTIDNVK	16	Unmodified	_TITLEVESSDTIDNVK_	0.60459	0.97906	-0.0305308
LIFAGKQLEDGR	12	GlyGly (K)	_LIFAGK(gl)QLEDGR_	0.6048	0.92077	-0.119087
TITLEVESSDTIDNVK	16	Unmodified	_TITLEVESSDTIDNVK_	0.60587	0.9292	-0.105939
TITLEVESSDTIDNVK	16	Unmodified	_TITLEVESSDTIDNVK_	0.60628	0.97484	-0.0367626
TLSDYNIQKESTLHLVLRLR	20	GlyGly (K)	_TLSDYNIQK(gl)ESTLHLVLRLR_	0.60792	0.97194	-0.0410608
ESTLHLVLR	9	Unmodified	_ESTLHLVLR_	0.61056	0.94722	-0.0782286
TITLEVESSDTIDNVK	16	Unmodified	_TITLEVESSDTIDNVK_	0.61181	0.95619	-0.0646308
TITLEVESSDTIDNVK	16	Unmodified	_TITLEVESSDTIDNVK_	0.61196	0.95327	-0.0690432
TITLEVESSDTIDNVK	16	Unmodified	_TITLEVESSDTIDNVK_	0.61399	0.92149	-0.11796
TITLEVESSDTIDNVK	16	Unmodified	_TITLEVESSDTIDNVK_	0.61482	0.96076	-0.057752
TITLEVESSDTIDNVK	16	Unmodified	_TITLEVESSDTIDNVK_	0.61508	0.96949	-0.0447021
LIFAGKQLEDGR	12	GlyGly (K)	_LIFAGK(gl)QLEDGR_	0.61956	0.96709	-0.0482779
TITLEVESSDTIDNVK	16	Unmodified	_TITLEVESSDTIDNVK_	0.62628	0.93944	-0.0901271
TITLEVESSDTIDNVK	16	Unmodified	_TITLEVESSDTIDNVK_	0.6296	0.95717	-0.0631529
TITLEVESSDTIDNVKSK	18	Unmodified	_TITLEVESSDTIDNVKSK_	0.64422	0.97715	-0.0333481
QLEDGRTLSDYNIQKESTLHLVLR	24	Unmodified	_QLEDGRTLSDYNIQKESTLHLVLR_	0.6579	1.045	0.0635029
TLSDYNIQKESTLHLVLR	18	GlyGly (K)	_TLSDYNIQK(gl)ESTLHLVLR_	0.66024	1.0359	0.0508847
TLSDYNIQKESTLHLVLRLR	20	GlyGly (K)	_TLSDYNIQK(gl)ESTLHLVLRLR_	0.67828	1.082	0.1137
QLEDGRTLSDYNIQKESTLHLVLR	24	Unmodified	_QLEDGRTLSDYNIQKESTLHLVLR_	0.68585	1.0888	0.122739
TLSDYNIQKESTLHLVLR	18	Phospho (ST)	_TLSDYNIQKES(ph)TLHLVLR_	0.71724	1.156	0.209141
TLSDYNIQKESTLHLVLR	18	GlyGly (K)	_TLSDYNIQK(gl)ESTLHLVLR_	0.72005	1.118	0.16092
TITLEVESSDTIDNVK	16	Unmodified	_TITLEVESSDTIDNVK_	0.86154	1.3232	0.404031
MQIFVKTLTGK	11	Unmodified	_MQIFVKTLTGK_	0.92637	1.4045	0.490057
TLSDYNIQKESTLHLVLRLR	20	Unmodified	_TLSDYNIQKESTLHLVLRLR_	0.94667	1.4532	0.539233
SKIQDKEGIPPDQQR	15	Unmodified	_SKIQDKEGIPPDQQR_	1.2042	1.8215	0.865127

## Sheet: Fig 3E Rep2
Sequence	Length	Modifications	Modified sequence	Ratio H/L	Ratio H/L normalized	log(norm)
TLSDYNIQK	9	Phospho (ST)	_TLS(ph)DYNIQK_	0.1055	0.23649	-2.08015
TITLEVESSDTIDNVK	16	Unmodified	_TITLEVESSDTIDNVK_	0.23002	0.54962	-0.863494
TITLEVESSDTIDNVK	16	Unmodified	_TITLEVESSDTIDNVK_	0.29237	0.63491	-0.655376
TLSDYNIQKESTLHLVLR	18	Unmodified	_TLSDYNIQKESTLHLVLR_	0.30107	0.72129	-0.471349
TLSDYNIQKESTLHLVLR	18	Unmodified	_TLSDYNIQKESTLHLVLR_	0.34125	0.80271	-0.317049
IQDKEGIPPDQQR	13	Unmodified	_IQDKEGIPPDQQR_	0.36039	0.82698	-0.274076
TITLEVESSDTIDNVK	16	Unmodified	_TITLEVESSDTIDNVK_	0.39161	0.9049	-0.14417
TITLEVESSDTIDNVK	16	Unmodified	_TITLEVESSDTIDNVK_	0.43107	0.96589	-0.0500692
TLSDYNIQKESTLHLVLR	18	GlyGly (K)	_TLSDYNIQK(gl)ESTLHLVLR_	0.40785	0.96668	-0.0488897
TITLEVESSDTIDNVK	16	Unmodified	_TITLEVESSDTIDNVK_	0.43217	0.99248	-0.0108901
LIFAGKQLEDGR	12	GlyGly (K)	_LIFAGK(gl)QLEDGR_	0.41435	0.99361	-0.0092484
TLTGKTITLEVESSDTIDNVK	21	Unmodified	_TLTGKTITLEVESSDTIDNVK_	0.42959	1.0035	0.00504062
TITLEVESSDTIDNVK	16	Unmodified	_TITLEVESSDTIDNVK_	0.45623	1.0189	0.0270125
TITLEVESSDTIDNVKSK	18	GlyGly (K)	_TITLEVESSDTIDNVK(gl)SK_	0.451	1.036	0.051024
IQDKEGIPPDQQR	13	Unmodified	_IQDKEGIPPDQQR_	0.44318	1.0452	0.063779
TITLEVESSDTIDNVK	16	Unmodified	_TITLEVESSDTIDNVK_	0.49854	1.0584	0.081885
TITLEVESSDTIDNVK	16	Unmodified	_TITLEVESSDTIDNVK_	0.47542	1.067	0.0935602
IQDKEGIPPDQQR	13	Unmodified	_IQDKEGIPPDQQR_	0.45527	1.0701	0.0977456
TITLEVESSDTIDNVK	16	Unmodified	_TITLEVESSDTIDNVK_	0.47282	1.0894	0.123534
IQDKEGIPPDQQR	13	Unmodified	_IQDKEGIPPDQQR_	0.45871	1.0934	0.128821
TLSDYNIQKESTLHLVLR	18	GlyGly (K)	_TLSDYNIQK(gl)ESTLHLVLR_	0.46915	1.1222	0.16633
TLTGKTITLEVESSDTIDNVK	21	GlyGly (K)	_TLTGK(gl)TITLEVESSDTIDNVK_	0.47209	1.1341	0.181548
TITLEVESSDTIDNVK	16	Unmodified	_TITLEVESSDTIDNVK_	0.49472	1.1368	0.184978
IQDKEGIPPDQQR	13	Unmodified	_IQDKEGIPPDQQR_	0.47984	1.1439	0.193961
ESTLHLVLR	9	Unmodified	_ESTLHLVLR_	0.50113	1.165	0.22033
EGIPPDQQR	9	Unmodified	_EGIPPDQQR_	0.49227	1.177	0.235114
EGIPPDQQR	9	Unmodified	_EGIPPDQQR_	0.49595	1.1781	0.236462
TITLEVESSDTIDNVK	16	Unmodified	_TITLEVESSDTIDNVK_	0.51315	1.1877	0.24817
TLSDYNIQK	9	Unmodified	_TLSDYNIQK_	0.50228	1.2095	0.274411
TITLEVESSDTIDNVK	16	Unmodified	_TITLEVESSDTIDNVK_	0.51937	1.2128	0.278342
TLSDYNIQK	9	Unmodified	_TLSDYNIQK_	0.51681	1.2157	0.281787
LIFAGKQLEDGR	12	Unmodified	_LIFAGKQLEDGR_	0.51962	1.2412	0.311736
TITLEVESSDTIDNVK	16	Unmodified	_TITLEVESSDTIDNVK_	0.59539	1.3801	0.464773

## Sheet: Fig 3E Rep3
Sequence	Length	Modifications	Modified sequence	Ratio H/L	Ratio H/L normalized
TLSDYNIQK	9	Phospho (ST)	_TLpSDYNIQK_	0.3563	0.34828	-1.52168
TLSDYNIQKESTLHLVLR	18	Phospho (ST)	_TLSDYNIQKEpSTLHLVLR_	0.53018	0.51267	-0.963898
TLSDYNIQKESTLHLVLR	18	Unmodified	_TLSDYNIQKESTLHLVLR_	0.58376	0.56294	-0.828947
TLSDYNIQKESTLHLVLR	18	Unmodified	_TLSDYNIQKESTLHLVLR_	0.62784	0.59201	-0.756307
EGIPPDQQR	9	Unmodified	_EGIPPDQQR_	0.75179	0.73121	-0.451642
IQDKEGIPPDQQR	13	Unmodified	_IQDKEGIPPDQQR_	0.77965	0.73515	-0.443889
LIFAGKQLEDGR	12	Unmodified	_LIFAGKQLEDGR_	0.78786	0.74461	-0.425443
IQDKEGIPPDQQR	13	Unmodified	_IQDKEGIPPDQQR_	0.85275	0.80315	-0.316259
ESTLHLVLR	9	Unmodified	_ESTLHLVLR_	0.82536	0.80612	-0.310933
IQDKEGIPPDQQR	13	Unmodified	_IQDKEGIPPDQQR_	0.8469	0.81851	-0.288928
TITLEVESSDTIDNVK	16	Unmodified	_TITLEVESSDTIDNVK_	0.85552	0.83033	-0.268243
IQDKEGIPPDQQR	13	Unmodified	_IQDKEGIPPDQQR_	0.88377	0.83943	-0.252518
IQDKEGIPPDQQR	13	Unmodified	_IQDKEGIPPDQQR_	0.87901	0.85616	-0.224048
EGIPPDQQR	9	Unmodified	_EGIPPDQQR_	0.9016	0.86612	-0.207361
EGIPPDQQR	9	Unmodified	_EGIPPDQQR_	0.89591	0.88141	-0.182115
TITLEVESSDTIDNVK	16	Unmodified	_TITLEVESSDTIDNVK_	0.90826	0.89284	-0.163526
TITLEVESSDTIDNVK	16	Unmodified	_TITLEVESSDTIDNVK_	0.92496	0.8984	-0.15457
ESTLHLVLR	9	Unmodified	_ESTLHLVLR_	0.97197	0.91517	-0.127888
TITLEVESSDTIDNVK	16	Unmodified	_TITLEVESSDTIDNVK_	0.96756	0.94305	-0.0845938
TLSDYNIQK	9	Unmodified	_TLSDYNIQK_	0.97402	0.94831	-0.0765693
TITLEVESSDTIDNVK	16	Unmodified	_TITLEVESSDTIDNVK_	0.95257	0.95061	-0.0730745
TITLEVESSDTIDNVK	16	Unmodified	_TITLEVESSDTIDNVK_	0.98676	0.96151	-0.0566262
TITLEVESSDTIDNVK	16	Unmodified	_TITLEVESSDTIDNVK_	0.99093	0.9666	-0.0490091
TLSDYNIQK	9	Unmodified	_TLSDYNIQK_	1.0116	0.97743	-0.0329347
TITLEVESSDTIDNVK	16	Unmodified	_TITLEVESSDTIDNVK_	1.0151	0.98371	-0.023695
TITLEVESSDTIDNVK	16	Unmodified	_TITLEVESSDTIDNVK_	1.0416	1.021	0.0299829
TITLEVESSDTIDNVK	16	Unmodified	_TITLEVESSDTIDNVK_	1.0354	1.0517	0.0727232
TITLEVESSDTIDNVK	16	Unmodified	_TITLEVESSDTIDNVK_	1.1672	1.144	0.194087
LIFAGKQLEDGR	12	GlyGly (K)	_LIFAGK(gl)QLEDGR_	1.2017	1.1549	0.207768
TITLEVESSDTIDNVK	16	Unmodified	_TITLEVESSDTIDNVK_	1.2736	1.2415	0.312084
TLSDYNIQKESTLHLVLR	18	GlyGly (K)	_TLSDYNIQK(gl)ESTLHLVLR_	1.7142	1.6138	0.690462

## Sheet: Fig 3F Rep1
Sequence	Length	Modifications	Modified sequence	Ratio H/L	Ratio H/L normalized	log(norm)
TLSDYNIQK	9	Phospho (STY)	_TLS(ph)DYNIQK_	2.9742	2.80083	1.48585
TLSDYNIQKESTLHLVLR	18	GlyGly (K)	_TLSDYNIQK(gl)ESTLHLVLR_	1.8404	1.73312	0.793371
TLSDYNIQKESTLHLVLR	18	GlyGly (K)	_TLSDYNIQK(gl)ESTLHLVLR_	1.8203	1.71419	0.777528
TLSDYNIQKESTLHLVLR	18	GlyGly (K)	_TLSDYNIQK(gl)ESTLHLVLR_	1.7646	1.66174	0.732693
TLSDYNIQKESTLHLVLR	18	GlyGly (K)	_TLSDYNIQK(gl)ESTLHLVLR_	1.7177	1.61757	0.69383
LIFAGKQLEDGR	12	Unmodified	_LIFAGKQLEDGR_	1.582	1.48978	0.575102
LIFAGKQLEDGR	12	GlyGly (K)	_LIFAGK(gl)QLEDGR_	1.3415	1.2633	0.337199
LIFAGKQLEDGR	12	GlyGly (K)	_LIFAGK(gl)QLEDGR_	1.3141	1.2375	0.307427
TLSDYNIQK	9	Unmodified	_TLSDYNIQK_	1.3017	1.22582	0.293749
IQDKEGIPPDQQR	13	Unmodified	_IQDKEGIPPDQQR_	1.2516	1.17864	0.237126
TITLEVESSDTIDNVK	16	Unmodified	_TITLEVESSDTIDNVK_	1.2349	1.16292	0.217746
ESTLHLVLR	9	Unmodified	_ESTLHLVLR_	1.1882	1.11894	0.16213
IQDKEGIPPDQQR	13	Unmodified	_IQDKEGIPPDQQR_	1.1565	1.08909	0.123117
ESTLHLVLR	9	Unmodified	_ESTLHLVLR_	1.1125	1.04765	0.0671574
TLSDYNIQK	9	Unmodified	_TLSDYNIQK_	1.1064	1.04191	0.0592251
IQDKEGIPPDQQR	13	Unmodified	_IQDKEGIPPDQQR_	1.0995	1.03541	0.0501997
TITLEVESSDTIDNVK	16	Unmodified	_TITLEVESSDTIDNVK_	1.0784	1.01554	0.0222445
TITLEVESSDTIDNVK	16	Unmodified	_TITLEVESSDTIDNVK_	1.0747	1.01205	0.0172861
TITLEVESSDTIDNVK	16	Unmodified	_TITLEVESSDTIDNVK_	1.054	0.992561	-0.010773
TITLEVESSDTIDNVK	16	Unmodified	_TITLEVESSDTIDNVK_	1.0499	0.9887	-0.016396
TITLEVESSDTIDNVK	16	Unmodified	_TITLEVESSDTIDNVK_	1.036	0.97561	-0.0356239
TLTGKTITLEVESSDTIDNVK	21	GlyGly (K)	_TLTGK(gl)TITLEVESSDTIDNVK_	1.0332	0.972973	-0.0395284
EGIPPDQQR	9	Unmodified	_EGIPPDQQR_	1.0213	0.961767	-0.0562412
TITLEVESSDTIDNVK	16	Unmodified	_TITLEVESSDTIDNVK_	1.0106	0.95169	-0.0714358
ESTLHLVLR	9	Unmodified	_ESTLHLVLR_	1.0103	0.951408	-0.0718642
TITLEVESSDTIDNVK	16	Unmodified	_TITLEVESSDTIDNVK_	1.0086	0.949807	-0.0742938
TITLEVESSDTIDNVK	16	Unmodified	_TITLEVESSDTIDNVK_	0.9731	0.916376	-0.125988
ESTLHLVLR	9	Phospho (STY)	_EST(ph)LHLVLR_	0.96855	0.912092	-0.132749
TITLEVESSDTIDNVK	16	Phospho (STY)	_TITLEVES(ph)SDTIDNVK_	0.93478	0.88029	-0.183949
IQDKEGIPPDQQR	13	Unmodified	_IQDKEGIPPDQQR_	0.90856	0.855598	-0.224994
TITLEVESSDTIDNVK	16	Unmodified	_TITLEVESSDTIDNVK_	0.7898	0.743761	-0.427089

## Sheet: Fig 3F Rep2
Sequence	Length	Modifications	Modified sequence	Ratio H/L	Ratio H/L normalized	log(norm)
TLSDYNIQK	9	Phospho (STY)	_TLS(ph)DYNIQK_	3.5651	2.56593	1.35948
EGIPPDQQR	9	Unmodified	_EGIPPDQQR_	1.9735	1.4204	0.506295
EGIPPDQQR	9	Unmodified	_EGIPPDQQR_	1.6395	1.18001	0.238794
ESTLHLVLR	9	Unmodified	_ESTLHLVLR_	1.3377	0.96279	-0.0547074
ESTLHLVLR	9	Unmodified	_ESTLHLVLR_	1.2976	0.933928	-0.0986163
LIFAGKQLEDGR	12	GlyGly (K)	_LIFAGK(gl)QLEDGR_	1.2982	0.93436	-0.0979493
TLSDYNIQK	9	Unmodified	_TLSDYNIQK_	1.2918	0.929754	-0.105079
LIFAGKQLEDGR	12	GlyGly (K)	_LIFAGK(gl)QLEDGR_	1.2856	0.925291	-0.11202
ESTLHLVLR	9	Unmodified	_ESTLHLVLR_	1.2584	0.905715	-0.142871
LIFAGKQLEDGR	12	GlyGly (K)	_LIFAGK(gl)QLEDGR_	1.248	0.898229	-0.154844
TITLEVESSDTIDNVK	16	Unmodified	_TITLEVESSDTIDNVK_	1.2307	0.885778	-0.174983
LIFAGKQLEDGR	12	GlyGly (K)	_LIFAGK(gl)QLEDGR_	1.1415	0.821578	-0.283531
TITLEVESSDTIDNVK	16	Unmodified	_TITLEVESSDTIDNVK_	1.2007	0.864186	-0.210586
TITLEVESSDTIDNVK	16	Unmodified	_TITLEVESSDTIDNVK_	1.1758	0.846265	-0.240819
ESTLHLVLR	9	Unmodified	_ESTLHLVLR_	1.1744	0.845257	-0.242538
TITLEVESSDTIDNVK	16	Unmodified	_TITLEVESSDTIDNVK_	1.1714	0.843098	-0.246228
LIFAGKQLEDGR	12	GlyGly (K)	_LIFAGK(gl)QLEDGR_	1.165	0.838491	-0.254132
TITLEVESSDTIDNVK	16	Unmodified	_TITLEVESSDTIDNVK_	1.1595	0.834533	-0.260959
TITLEVESSDTIDNVK	16	Unmodified	_TITLEVESSDTIDNVK_	1.1483	0.826472	-0.274962
TITLEVESSDTIDNVK	16	Unmodified	_TITLEVESSDTIDNVK_	1.1265	0.810782	-0.302615
ESTLHLVLR	9	Unmodified	_ESTLHLVLR_	1.1311	0.814092	-0.296736
LIFAGKQLEDGR	12	GlyGly (K)	_LIFAGK(gl)QLEDGR_	1.089	0.783792	-0.351458

## Sheet: Fig 3F Rep3
Sequence	Length	Modifications	Modified sequence	Ratio H/L	Ratio H/L normalized
TLSDYNIQK	9	Phospho (STY)	_TLS(ph)DYNIQK_	2.058	2.11144	1.07823
TITLEVESSDTIDNVK	16	Unmodified	_TITLEVESSDTIDNVK_	1.1466	1.17637	0.234347
TLSDYNIQKESTLHLVLR	18	GlyGly (K)	_TLSDYNIQK(gl)ESTLHLVLR_	1.0714	1.09922	0.136482
IQDKEGIPPDQQR	13	Unmodified	_IQDKEGIPPDQQR_	1.0439	1.07101	0.0989682
TITLEVESSDTIDNVK	16	Unmodified	_TITLEVESSDTIDNVK_	1.0243	1.0509	0.071623
TLSDYNIQKESTLHLVLR	18	GlyGly (K)	_TLSDYNIQK(gl)ESTLHLVLR_	0.99213	1.01789	0.0255857
TLSDYNIQK	9	Unmodified	_TLSDYNIQK_	0.98932	1.01501	0.0214938
ESTLHLVLR	9	Unmodified	_ESTLHLVLR_	0.97908	1.0045	0.0064833
TITLEVESSDTIDNVK	16	Unmodified	_TITLEVESSDTIDNVK_	0.97031	0.995506	-0.0064977
LIFAGKQLEDGR	12	GlyGly (K)	_LIFAGK(gl)QLEDGR_	0.95868	0.983574	-0.0238941
TITLEVESSDTIDNVK	16	Unmodified	_TITLEVESSDTIDNVK_	0.9571	0.981953	-0.0262738
TLSDYNIQK	9	Unmodified	_TLSDYNIQK_	0.94992	0.974587	-0.0371374
LIFAGKQLEDGR	12	GlyGly (K)	_LIFAGK(gl)QLEDGR_	0.94028	0.964696	-0.051853
TITLEVESSDTIDNVK	16	Unmodified	_TITLEVESSDTIDNVK_	0.92864	0.952754	-0.069824
EGIPPDQQR	9	Unmodified	_EGIPPDQQR_	0.92521	0.949235	-0.0751626
EGIPPDQQR	9	Unmodified	_EGIPPDQQR_	0.91582	0.939601	-0.0898794
IQDKEGIPPDQQR	13	Unmodified	_IQDKEGIPPDQQR_	0.9057	0.929219	-0.10591
LIFAGKQLEDGR	12	GlyGly (K)	_LIFAGK(gl)QLEDGR_	0.9033	0.926756	-0.109738

## Sheet: Fig 3F Rep4
Sequence	Length	Modifications	Modified sequence	Ratio H/L	Ratio H/L normalized
TLSDYNIQK	9	Phospho (STY)	_TLS(ph)DYNIQK_	1.927	2.34565	1.22999
IQDKEGIPPDQQR	13	Unmodified	_IQDKEGIPPDQQR_	1.276	1.55322	0.635261
IQDKEGIPPDQQR	13	Unmodified	_IQDKEGIPPDQQR_	1.2174	1.48189	0.567436
LIFAGKQLEDGR	12	Unmodified	_LIFAGKQLEDGR_	1.2105	1.47349	0.559235
IQDKEGIPPDQQR	13	Unmodified	_IQDKEGIPPDQQR_	1.1723	1.42699	0.512974
TLSDYNIQKESTLHLVLR	18	GlyGly (K)	_TLSDYNIQK(gl)ESTLHLVLR_	1.142	1.39011	0.475195
IQDKEGIPPDQQR	13	Unmodified	_IQDKEGIPPDQQR_	1.0921	1.32937	0.410737
TLSDYNIQKESTLHLVLR	18	GlyGly (K)	_TLSDYNIQK(gl)ESTLHLVLR_	0.98844	1.20318	0.266858
ESTLHLVLR	9	Unmodified	_ESTLHLVLR_	0.95735	1.16534	0.220751
TLSDYNIQKESTLHLVLR	18	GlyGly (K)	_TLSDYNIQK(gl)ESTLHLVLR_	0.89044	1.08389	0.116223
TLSDYNIQKESTLHLVLR	18	GlyGly (K)	_TLSDYNIQK(gl)ESTLHLVLR_	0.88509	1.07738	0.107528
TLSDYNIQKESTLHLVLR	18	GlyGly (K)	_TLSDYNIQK(gl)ESTLHLVLR_	0.87184	1.06125	0.0857677
TITLEVESSDTIDNVK	16	Unmodified	_TITLEVESSDTIDNVK_	0.87022	1.05928	0.0830845
TITLEVESSDTIDNVK	16	Unmodified	_TITLEVESSDTIDNVK_	0.85298	1.03829	0.0542162
ESTLHLVLR	9	Unmodified	_ESTLHLVLR_	0.82931	1.00948	0.0136158
EGIPPDQQR	9	Unmodified	_EGIPPDQQR_	0.82152	1	0
TITLEVESSDTIDNVK	16	Unmodified	_TITLEVESSDTIDNVK_	0.81824	0.996007	-0.00577163
ESTLHLVLR	9	Unmodified	_ESTLHLVLR_	0.80409	0.978783	-0.0309387
TITLEVESSDTIDNVK	16	Unmodified	_TITLEVESSDTIDNVK_	0.79034	0.962046	-0.0558223
ESTLHLVLR	9	Unmodified	_ESTLHLVLR_	0.78614	0.956933	-0.0635094
LIFAGKQLEDGR	12	GlyGly (K)	_LIFAGK(gl)QLEDGR_	0.73306	0.892322	-0.164364
TLSDYNIQK	9	Unmodified	_TLSDYNIQK_	0.71108	0.865566	-0.208284
