# Supplementary material for: Identification of ubiquitin Ser57 kinases regulating the oxidative stress response in yeast
Source: eLife. 2020 Oct 19;9:e58155. doi: 10.7554/eLife.58155 (PMC7647399; doi:10.7554/eLife.58155)
Supplement: Figure 4—source data 1. [file elife-58155-fig4-data1.xlsx]

## Sheet: Fig 4B
	Growth Curve
	Lysine-dropout Synthetic Media supplemented with 8 µg/ml L-Canavanine
	SUB280: pADH1-Ub	pRS327 (empty vector)					pTDH3-Vhs1_pRS327					pTDH3-Vhs1 K41R_pRS327
	Incubation Time (h)	0	6	14	24	48	0	6	14	24	48	0	6	14	24	48
	R1	0.1	0.145	0.267	0.752	4.37	0.1	0.163	0.937	4.38	6.1	0.1	0.166	0.344	0.726	4.29
	R2	0.1	0.149	0.283	0.79	4.7	0.1	0.154	0.874	4.13	5.88	0.1	0.169	0.342	0.734	3.81
	R3	0.1	0.156	0.278	0.794	4.45	0.1	0.171	0.879	4.26	5.99	0.1	0.142	0.325	0.74	4.13
	AVERAGE	0.1	0.15	0.276	0.778667	4.50667	0.1	0.162667	0.896667	4.25667	5.99	0.1	0.159	0.337	0.733333	4.07667
	STDEV	1.69967e-17	0.00556776	0.00818535	0.0231805	0.172143	1.69967e-17	0.0085049	0.035019	0.125033	0.11	1.69967e-17	0.0147986	0.0104403	0.00702377	0.244404
	Student T-test (paired with empty vector)							0.0421354	0.00079862	0.000286944	0.00580808		0.257962	0.00990972	0.0213641	0.107662
		empty vector
		Vhs1
		Vhs1 K41R

## Sheet: Fig 4D
Growth Curve: -LYS SM (4 µg/ml canavanine)
OD600																											Student T-test (paired with Ub wt + EV)
	SUB280 pADH1-Ub wt + pRS327 (empty vector)						SUB280 pADH1-Ub wt + pJAM1740 (pTDH3-Vhs1_pRS327)						SUB280 pADH1-Ub S57A + pRS327 (empty vector)						SUB280 pADH1-Ub S57A + pJAM1740 (pTDH3-Vhs1_pRS327)								Ub wt		Ub S57A
	Time (h)	R1	R2	R3	AVERAGE	STDEV	Time (h)	R1	R2	R3	AVERAGE	STDEV	Time (h)	R1	R2	R3	AVERAGE	STDEV	Time (h)	R1	R2	R3	AVERAGE	STDEV		Time (h)	EV	Vhs1	EV	Vhs1
	0	0.1	0.1	0.1	0.1	1.69967e-17	0	0.1	0.1	0.1	0.1	1.69967e-17	0	0.1	0.1	0.1	0.1	1.69967e-17	0	0.1	0.1	0.1	0.1	1.69967e-17
	12	0.282	0.277	0.287	0.282	0.005	4	0.8	0.819	0.828	0.815667	0.0142945	4	0.296	0.322	0.302	0.306667	0.0136137	4	0.301	0.335	0.355	0.330333	0.0273008		12		0.000107838	0.0680705	0.0419002
	24	0.706	0.725	0.714	0.715	0.00953939	8	6.77	6.83	7.16	6.92	0.21	8	0.815	0.815	0.82	0.816667	0.00288675	8	0.814	0.827	0.733	0.791333	0.0509346		24		0.000190275	0.0016739	0.0585923
	48	7.46	7.56	7.66	7.56	0.1	12	8.96	8.96	8.92	8.94667	0.023094	12	7.58	7.21	7.02	7.27	0.284781	12	7	7.02	6.46	6.82667	0.3177		48		0.00125497	0.16027	0.0444109

## Sheet: Fig 4 Suppl 3 
	No LYS SM with 8 ug/ml thialysine
	SUB280 (Δubi) pRPS31-Ubiquitin wildtype
	in trans	pRS327(LYS2)						pTDH3-Vhs1_pRS327 (pJAM1740)						pTDH3-Vhs1 K41R_pRS327 (pJAM1771)							Student T-test (paired with EV)
		empty vector						Vhs1 OE						Vhs1 K41R OE							Time (h)	Vhs1
	Time (h)	R1	R2	R3	R4	AVE	STDEV	R1	R2	R3	R4	AVE	STDEV	R1	R2	R3	R4	AVE	STDEV			wt	K41R
	0	0.1	0.1	0.1	0.1	0.1	0	0.1	0.1	0.1	0.1	0.1	0	0.1	0.1	0.1	0.1	0.1	0
	12	0.34	0.381	0.352	0.344	0.35425	0.018518	1.059	1.009	0.984	0.989	1.01025	0.0342479	0.304	0.292	0.319	0.295	0.3025	0.0121244		12	3.76621e-05	0.0138784
	18	0.794	0.811	0.931	0.815	0.83775	0.0628298	2.624	2.317	2.202	2.147	2.3225	0.213114	0.558	0.512	0.577	0.515	0.5405	0.0321507		18	0.000647479	0.000575627
	24	2.42	2.66	2.8	2.54	2.605	0.162788	5.29	5.25	5.11	4.77	5.105	0.236291	1.65	2.02	1.6	1.56	1.7075	0.211562		24	0.000214699	0.00264317
	36	5.76	5.69	5.68	5.64	5.6925	0.0499166	6.51	6.27	6.41	5.94	6.2825	0.248646	4.32	4.77	4.34	4.44	4.4675	0.208387		36	0.00540237	0.000838664

## Sheet: Fig 4 Suppl 4
	Lysine-dropout Synthetic Media with 8 ug/ml thialysine
	SUB280 background
	pRPS31-Ub	WT												S57A
	in trans	pRS327(LYS2)						pTDH3-Vhs1_pRS327 (pJAM1740)						pRS327(LYS2)						pTDH3-Vhs1_pRS327 (pJAM1740)								Student T-test (paired with Ub wt + EV)
		empty vector						Vhs1						empty vector						Vhs1								Ub wt		Ub S57A
	Time (h)	R1	R2	R3	R4	AVE	STDEV	R1	R2	R3	R4	AVE	STDEV	R1	R2	R3	R4	AVE	STDEV	R1	R2	R3	R4	AVE	STDEV		Time (h)	EV	Vhs1	EV	Vhs1
	0	0.1	0.1	0.1	0.1	0.1	0	0.1	0.1	0.1	0.1	0.1	0	0.1	0.1	0.1	0.1	0.1	0	0.1	0.1	0.1	0.1	0.1	0
	12	0.386	0.403	0.393	0.365	0.38675	0.0160909	1.079	1.04	1.045	1.038	1.0505	0.0192267	0.358	0.377	0.355	0.354	0.361	0.0108012	0.387	0.401	0.381	0.42	0.39725	0.0173277		12		6.8886e-06	0.00954272	0.268317
	18	0.891	0.927	0.885	0.927	0.9075	0.0226495	2.155	2.234	2.247	2.061	2.17425	0.0857491	0.858	0.911	0.913	0.813	0.87375	0.0478426	0.801	0.831	0.846	0.852	0.8325	0.0227816		18		6.18735e-05	0.169025	0.00494149
	24	2.1	2.34	2.34	2.35	2.2825	0.121758	4.57	4.67	4.22	4.56	4.505	0.196384	2.05	2.18	2.38	2.42	2.2575	0.173662	1.98	1.92	1.86	1.91	1.9175	0.0492443		24		0.000198253	0.330959	0.0107623
	36	5.37	5.72	5.77	5.54	5.6	0.182392	6.41	6.3	6.5	6.1	6.3275	0.172313	6.15	6.13	5.93	6.12	6.0825	0.102429	4.84	4.7	4.79	4.53	4.715	0.13626		36		0.00359819	0.0174848	0.00249389

## Sheet: Fig 4E
	Starting OD: 0.02	OD600 of Yeast Cells: Growth sensitivity test in SM (-Leu, -Ura) ± H2O2
		Starting OD600 = 0.025																				Student T-test
	Genome	in trans			0 mM H2O2 (24 h)							1.5 mM H2O2 (48 h)							Genome	in trans		paired with Ub wt (0 mM H2O2)		paired with Ub wt (1.5 mM H2O2)
		LEU	URA		Replicate 1	Replicate 2	Replicate 3	Replicate 4	AVERAGE	STDEV		Replicate 1	Replicate 2	Replicate 3	Replicate 4	AVERAGE	STDEV			LEU	URA	0 mM H2O2	1.5 mM H2O2	1.5 mM H2O2
	parent (SEY6210)	pRS415 EV	pRS416 EV		5.13	4.54	4.48	4.45	4.65	0.32218		0.44	0.36	0.4	0.48	0.42	0.0516398		parent (SEY6210)	pRS415 EV	pRS416 EV		5.85027e-05
	Δsks1::TRP Δvhs1::TRP	pRS415 EV	pRS416 EV		4.53	4.65	4.63	4.79	4.65	0.107083		4.92	4.82	4.69	4.02	4.6125	0.406069		Δsks1::TRP Δvhs1::TRP	pRS415 EV	pRS416 EV	0.5	0.419681	0.000161286
		pADH1-Sks1	pRS416 EV		6.78	6.54	6.14	5.79	6.3125	0.437064		3.08	3.18	3.35	3.15	3.19	0.114601			pADH1-Sks1	pRS416 EV	0.000574258	0.00275444	1.91278e-05
		pADH1-Vhs1	pRS416 EV		5.3	5.26	5.34	5.49	5.3475	0.100457		4.34	4.46	4.24	4.54	4.395	0.132035			pADH1-Vhs1	pRS416 EV	0.0169344	0.136691	4.25841e-06
		pADH1-Vhs1	pTDH3-Sks1		6.68	6.08	5.66	5.72	6.035	0.468295		0.13	0.16	0.2	0.15	0.16	0.0294392			pADH1-Vhs1	pTDH3-Sks1	0.000341316	6.09833e-05	0.00249937
		Averages
WT	EV + EV	4.65	0.42
Δsks1Δvhs1	EV + EV	4.65	4.6125
	Sks1 + EV	6.3125	3.19
	Vhs1 + EV	5.3475	4.395
	Sks1 + Vhs1	6.035	0.16

## Sheet: Fig 4F
	OD600 of Yeast Cells: Growth sensitivity test in SM (-Ura) ± H2O2
	Starting OD600 = 0.025
	genome	in trans	0 mM H2O2 (24 h)							1.5 mM H2O2 (48 h)
			R1	R2	R3	R4	AVE	STDEV		R1	R2	R3	R4	AVE	STDEV
	SEY6210.1 (wt)	pRS416 EV	6.76	6.49	6.75	6.81	6.7025	0.144078		0.02	0.02	0.02	0.02	0.02	0
	Δsks1Δvhs1	pRS416 EV	6.57	6.57	6.67	6.5	6.5775	0.0699405		4.92	4.82	4.69	4.02	4.6125	0.406069
		pADH1-Ub WT	6.26	6.27	6.27	6.28	6.27	0.00816497		4.88	4.35	4.31	3.98	4.38	0.37229
		pADH1-Ub S57A	6.59	6.36	6.56	6.7	6.5525	0.141745		6.63	6.9	5.23	6.54	6.325	0.745855
		pADH1-Ub S57D	7.3	6.51	6.28	6.89	6.745	0.4474		0.54	0.43	0.38	0.21	0.39	0.137356
	genome	in trans	Average OD600		STDEV
			untreated	H2O2	untreated	H2O2
	SEY6210.1 (wt)	vector	6.7025	0.02	0.144078	0
	Δsks1Δvhs1	vector	6.5775	4.6125	0.0699405	0.406069
		Ub WT	6.27	4.38	0.00816497	0.37229
		Ub S57A	6.5525	6.325	0.141745	0.745855
		Ub S57D	6.745	0.39	0.4474	0.137356
			Student T-test
	genome	in trans	paired with Ub wt (0 mM H2O2)		paired with Ub wt (1.5 mM H2O2)
			0 mM H2O2	1.5 mM H2O2	1.5 mM H2O2
	SEY6210.1 (wt)	pRS416 EV		1.38083e-06
	Δsks1Δvhs1	pRS416 EV	0.251968	0.00172459	9.46137e-05
		pADH1-Ub WT	0.0236295	0.0010837	8.52499e-05
		pADH1-Ub S57A	0.00573085	0.302891	0.000225329			wt		Δsks1Δvhs1
		pADH1-Ub S57D	0.463723	6.63233e-06	0.00626445
	genome	in trans	Student T-test
			untreated vs H2O2-treated pairing
	SEY6210.1 (wt)	pRS416 EV	1.38083e-06
	Δsks1Δvhs1	pRS416 EV	0.00089226
		pADH1-Ub WT	0.0010837
		pADH1-Ub S57A	0.302891
		pADH1-Ub S57D	4.2248e-05
